# Supplementary material for: Development of the Niggle App for Supporting Young People on Their Dynamic Journey to Well-being: Co-design and Qualitative Research Study
Source: PubMed Central journal article supplement (PMC8097523; doi:10.2196/21085), 2021-04-20
Supplement: mhealth_v9i4e21085_app1.pdf [file mhealth_v9i4e21085_app1.pdf]

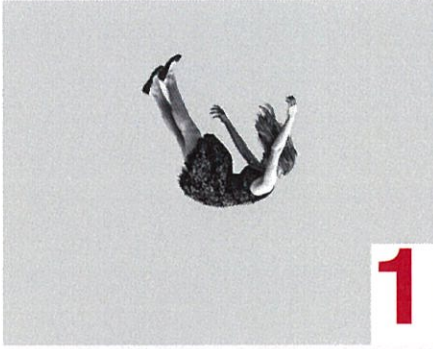

1

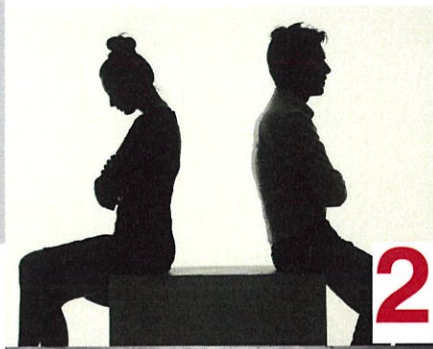

2

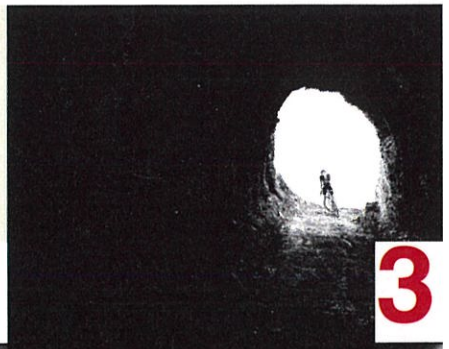

3

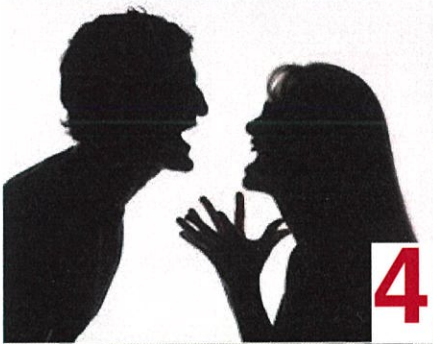

4

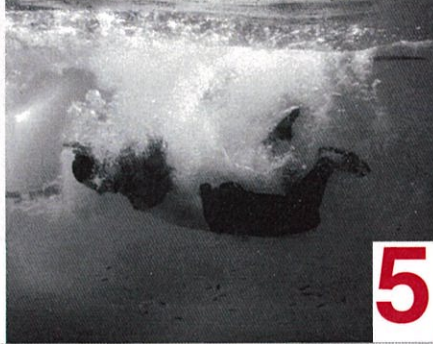

5

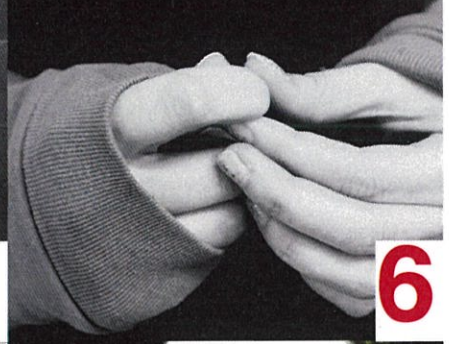

6

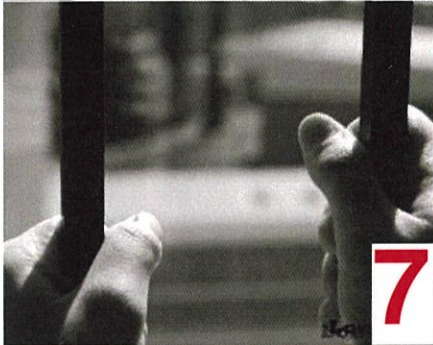

7

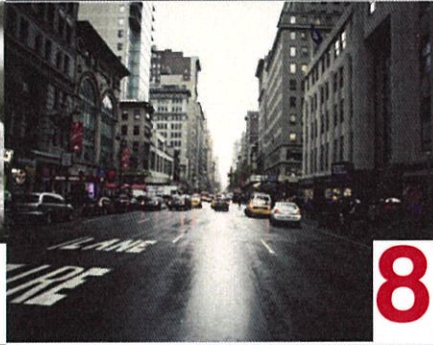

8

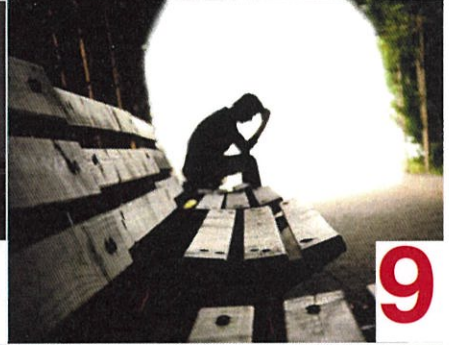

9

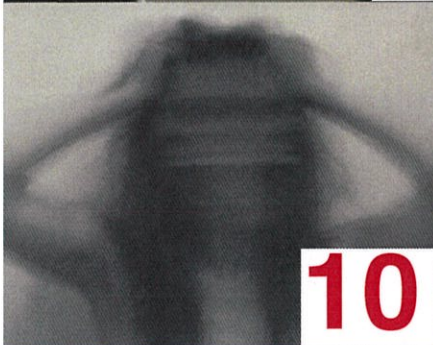

10

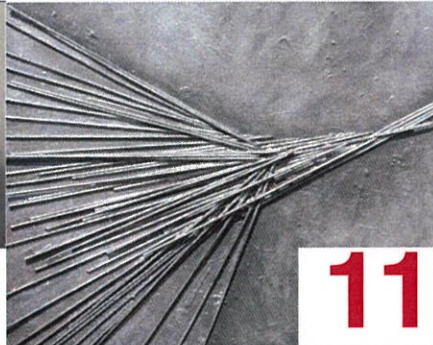

11

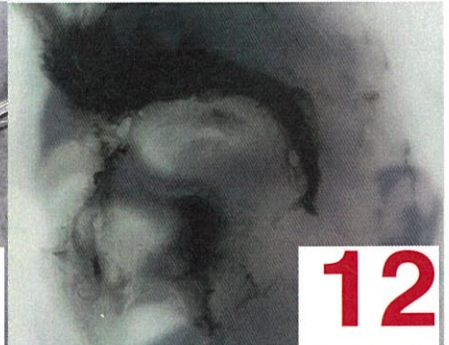

12

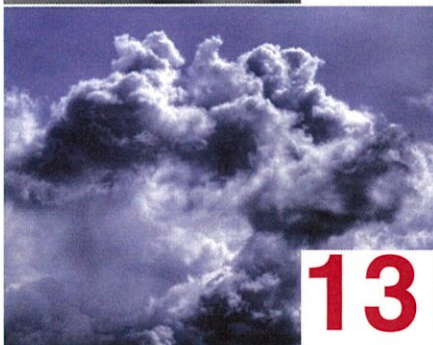

13

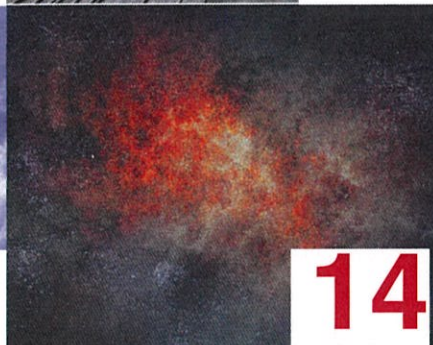

14

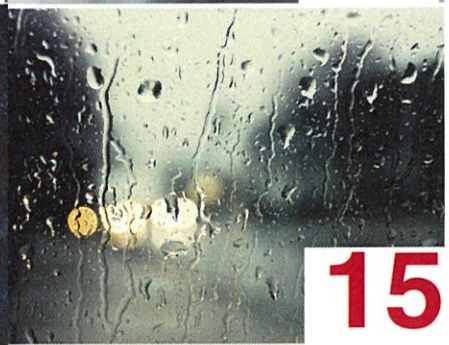

15

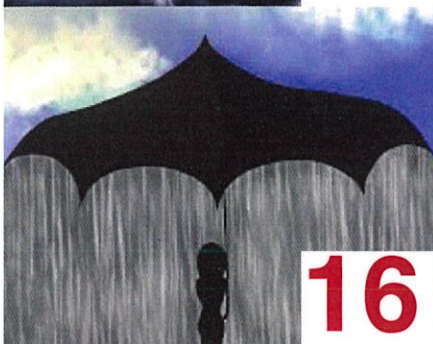

16

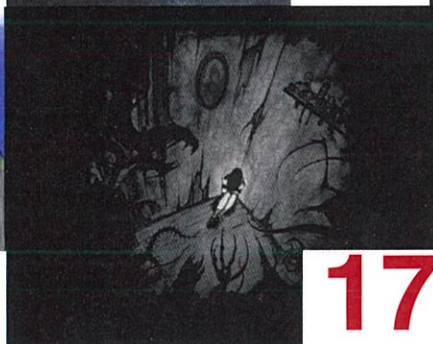

17

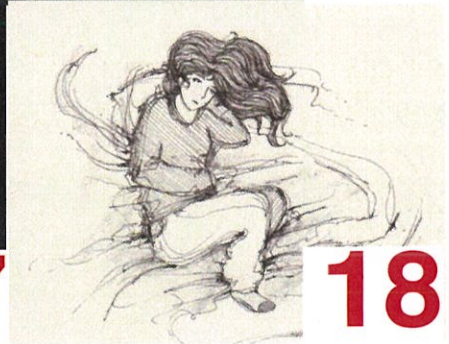

18

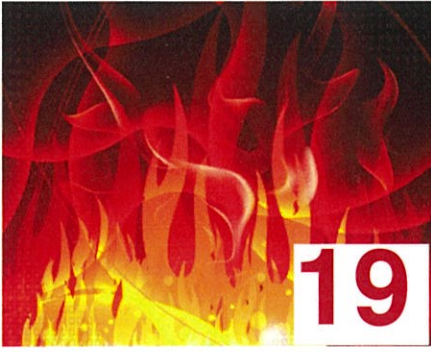

**19**

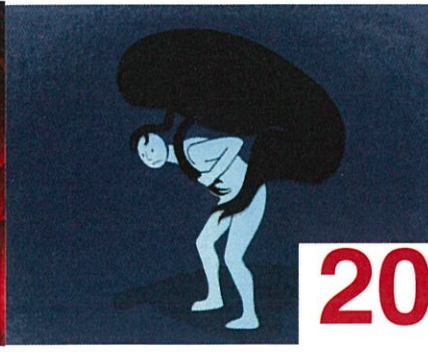

**20**

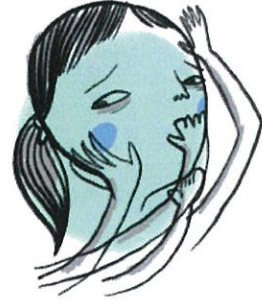

**21**

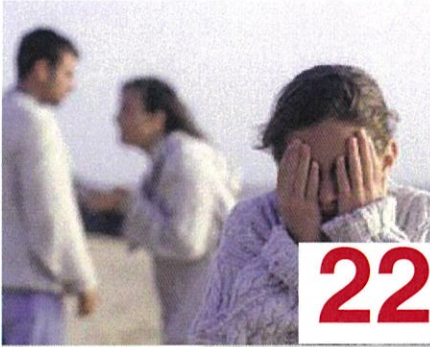

**22**

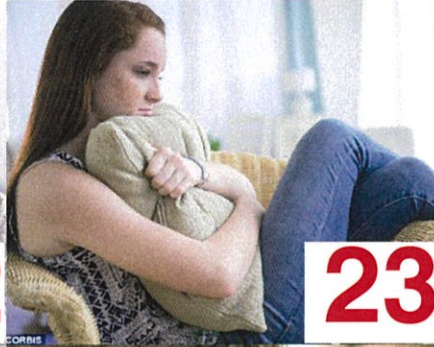

**23**

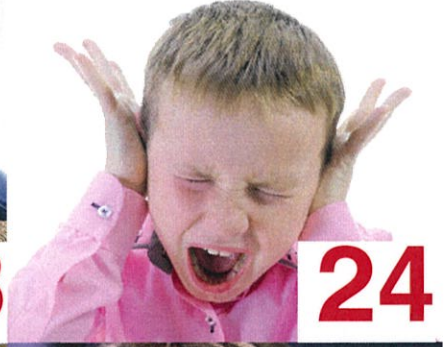

**24**

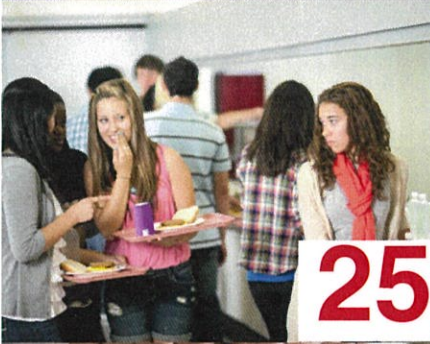

**25**

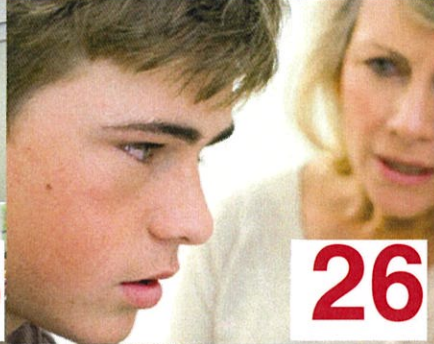

**26**

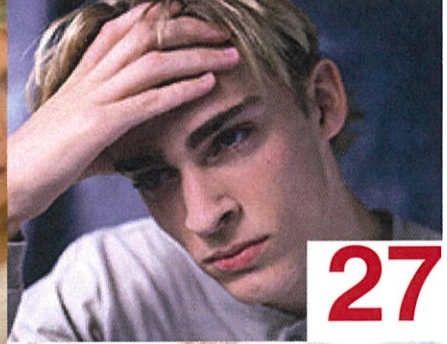

**27**

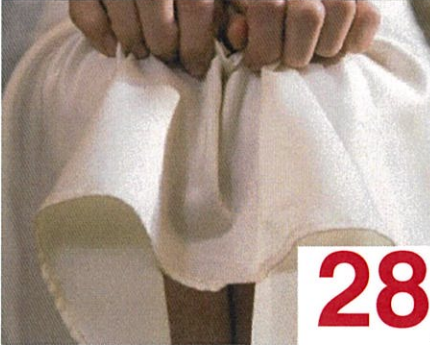

**28**

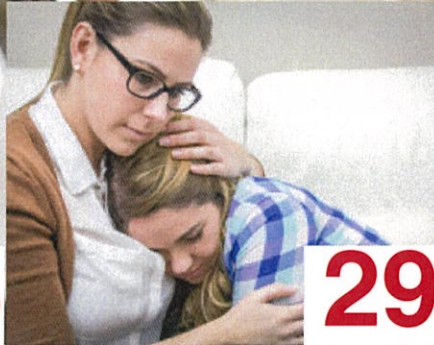

**29**

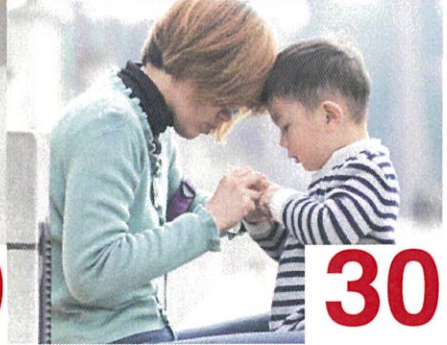

**30**

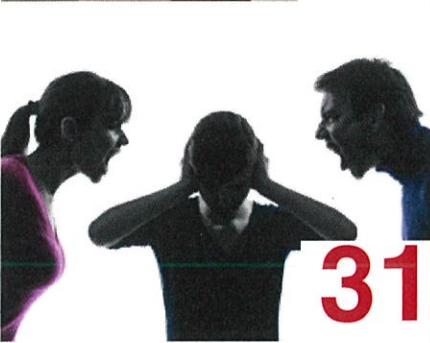

**31**

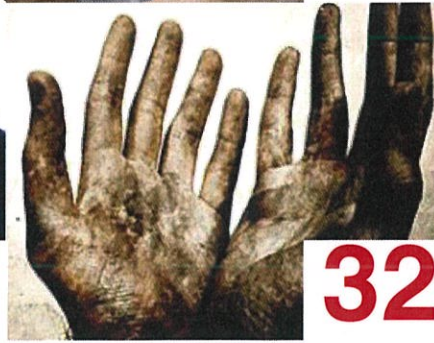

**32**

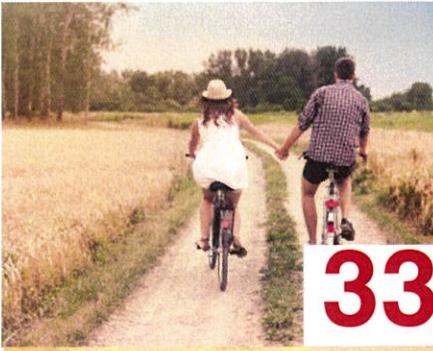

33

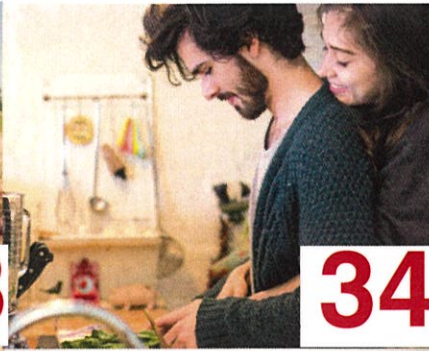

34

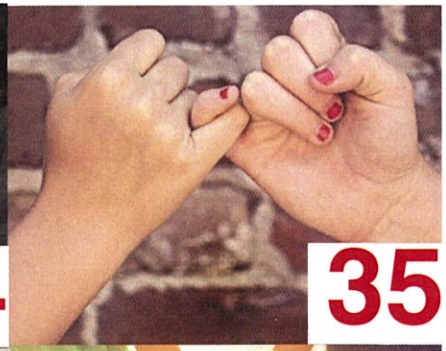

35

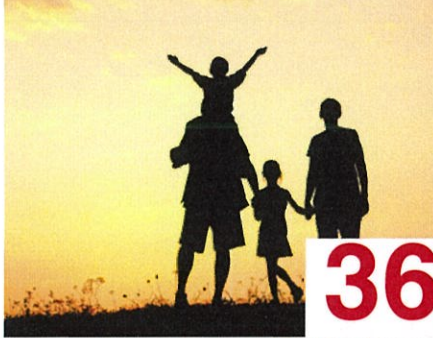

36

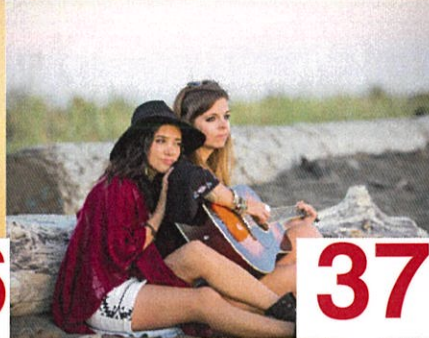

37

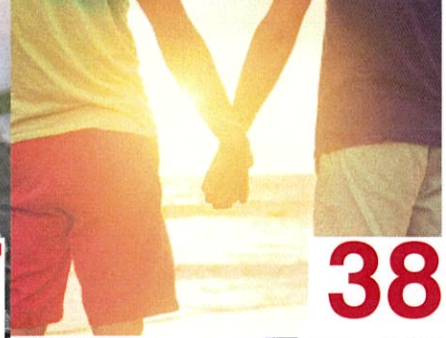

38

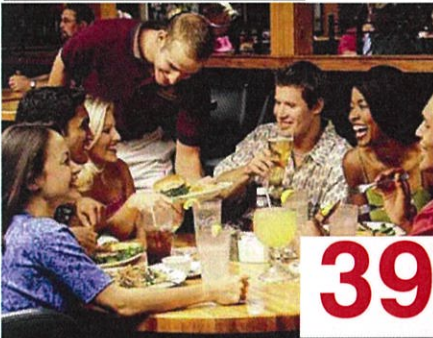

39

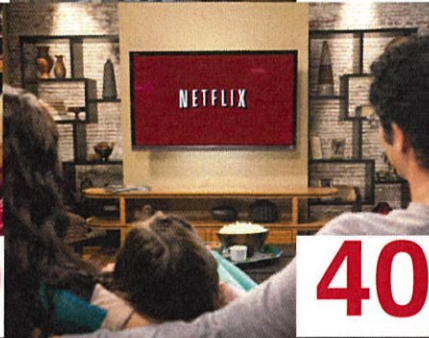

40

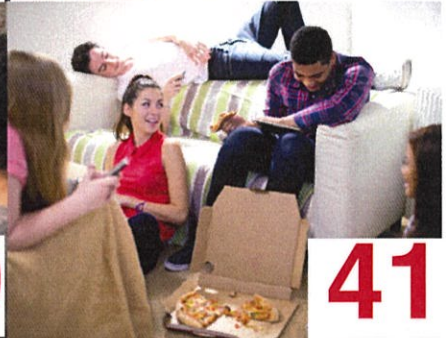

41

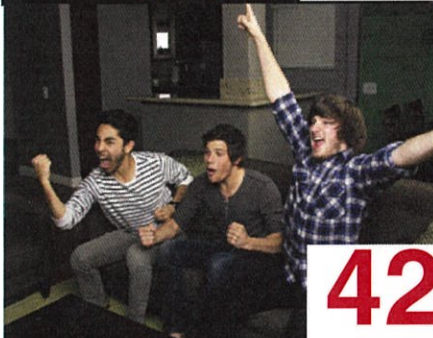

42

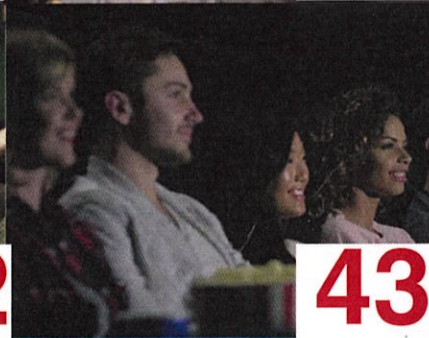

43

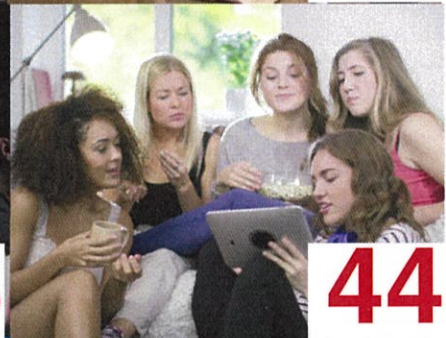

44

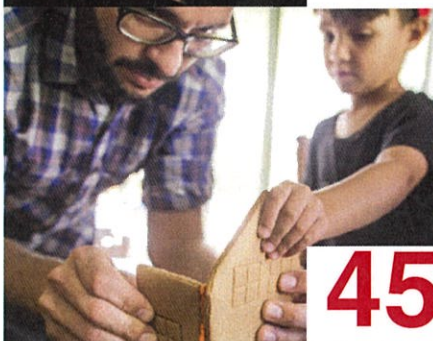

45

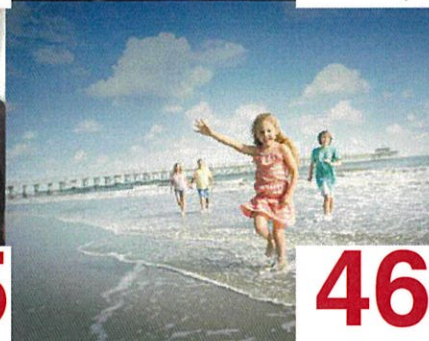

46

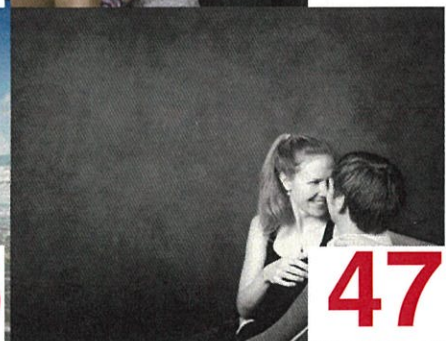

47

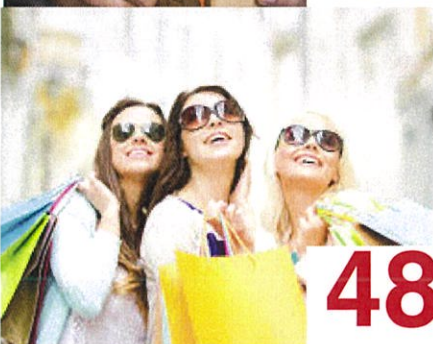

48

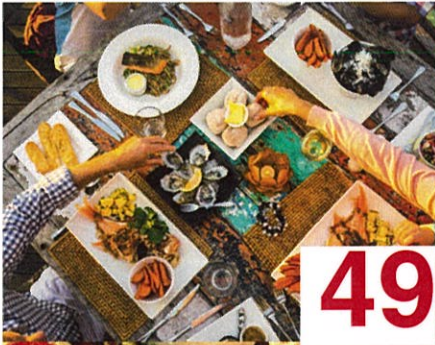

49

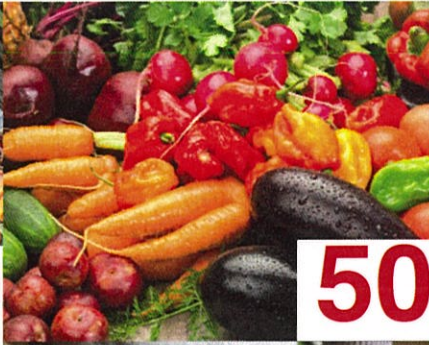

50

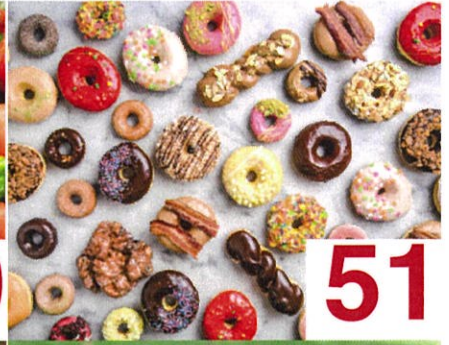

51

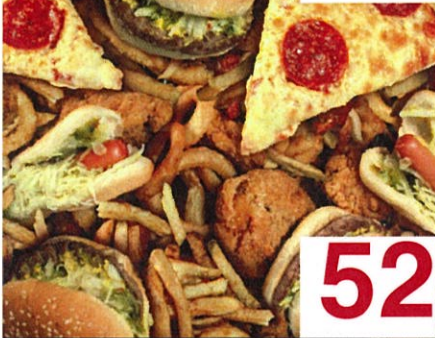

52

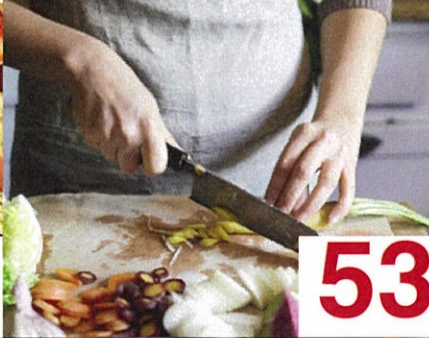

53

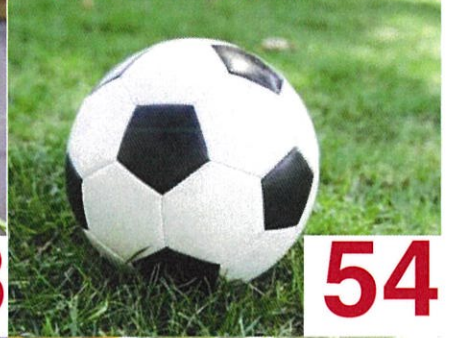

54

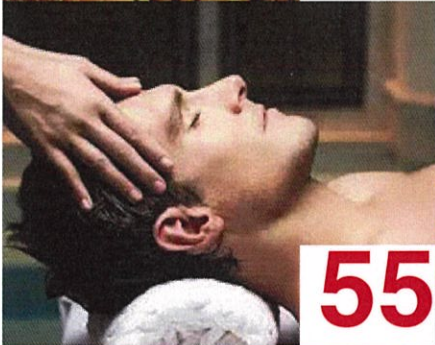

55

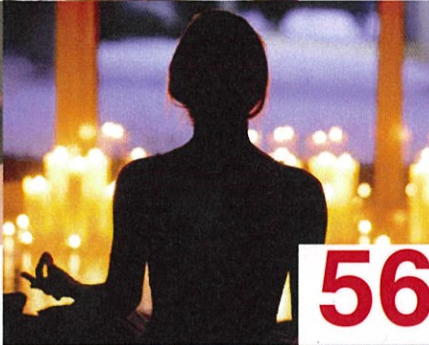

56

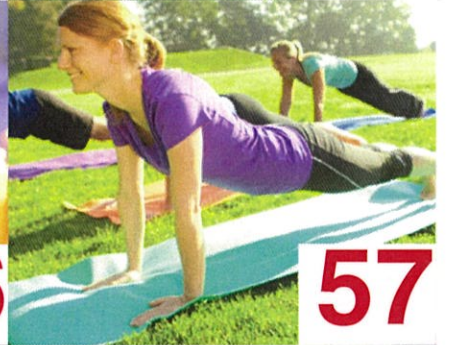

57

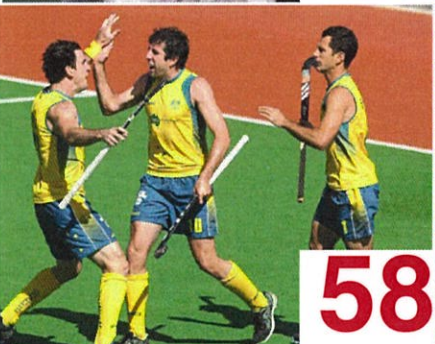

58

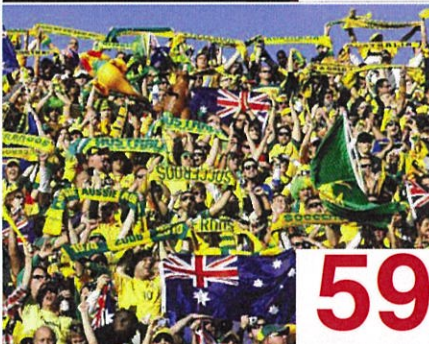

59

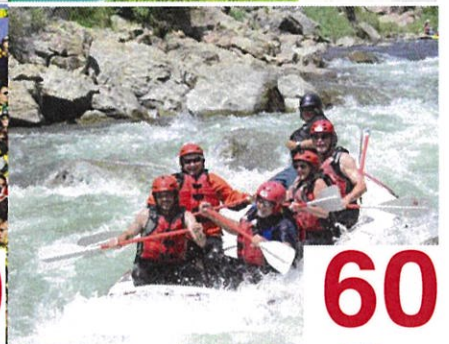

60

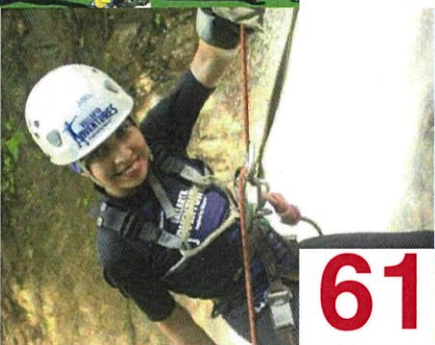

61

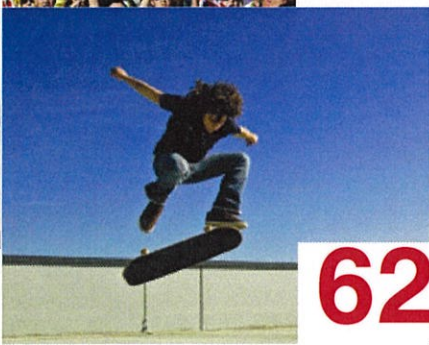

62

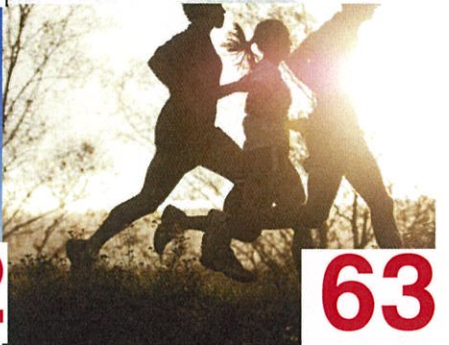

63

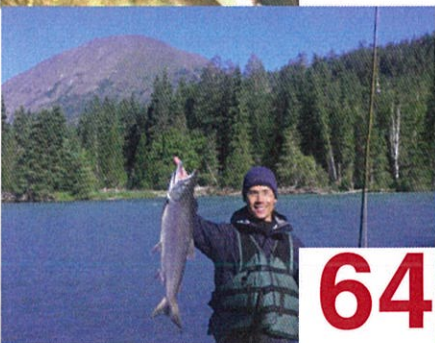

64

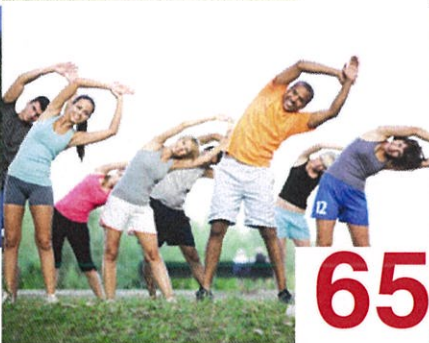

65

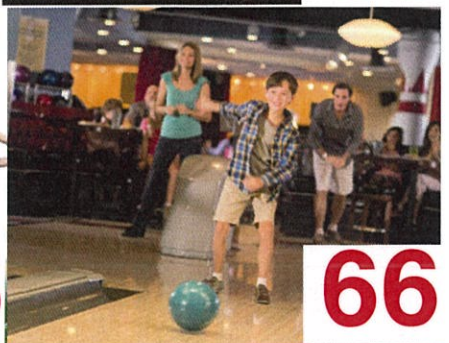

66

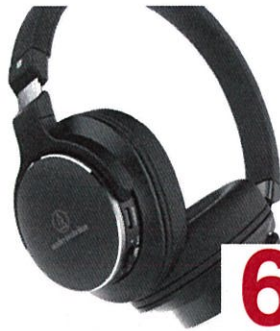

67

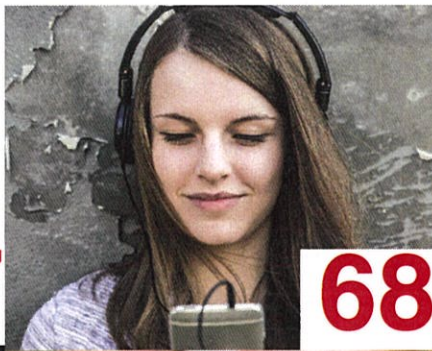

68

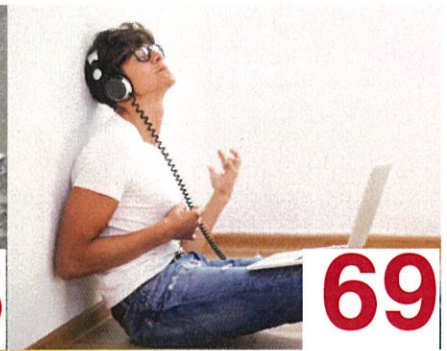

69

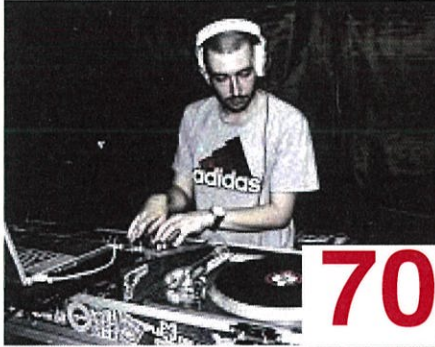

70

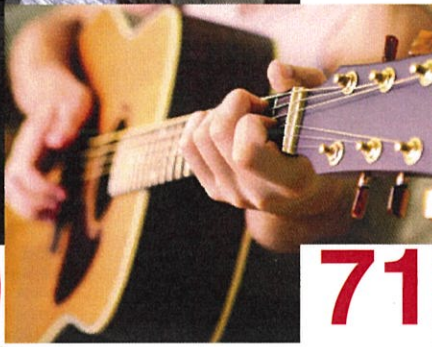

71

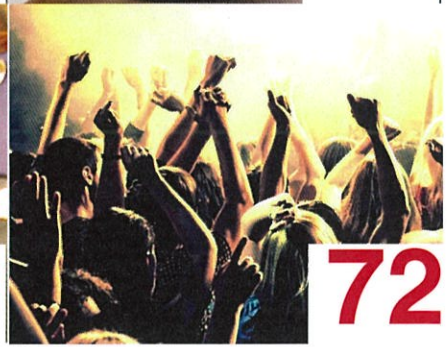

72

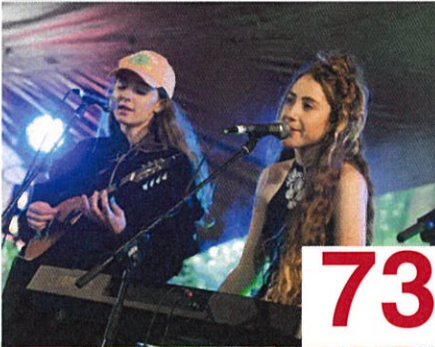

73

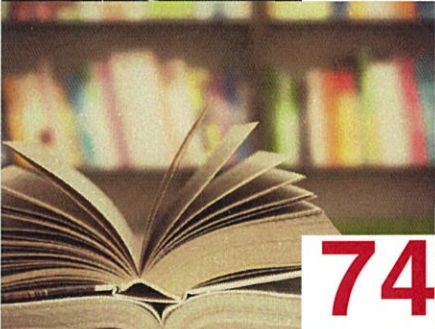

74

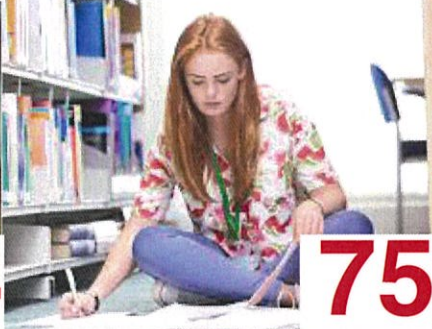

75

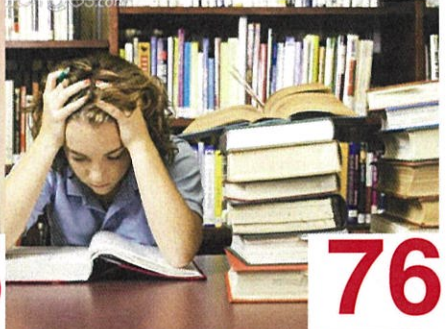

76

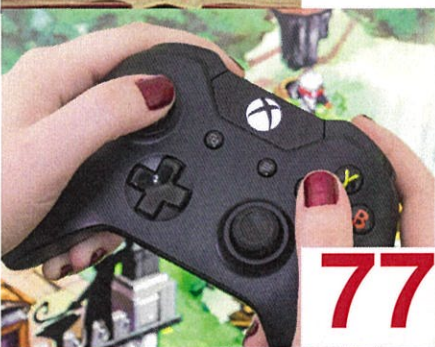

77

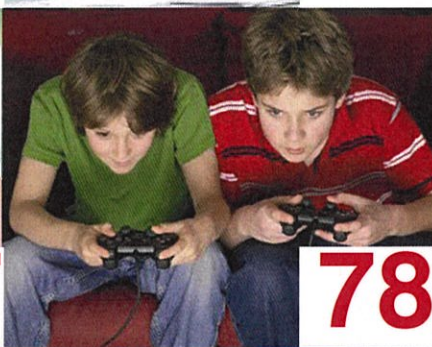

78

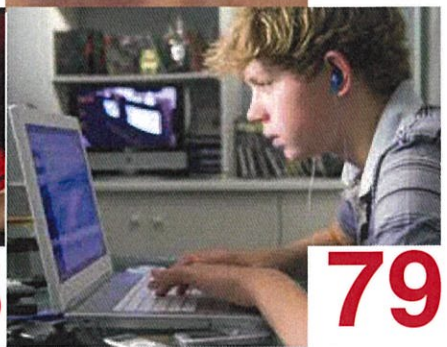

79

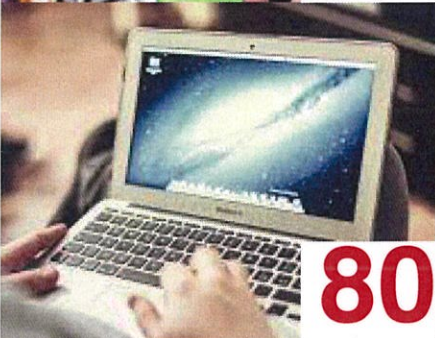

80

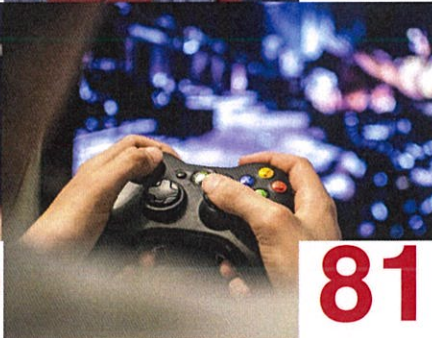

81

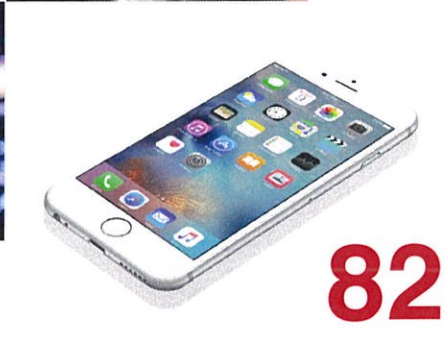

82

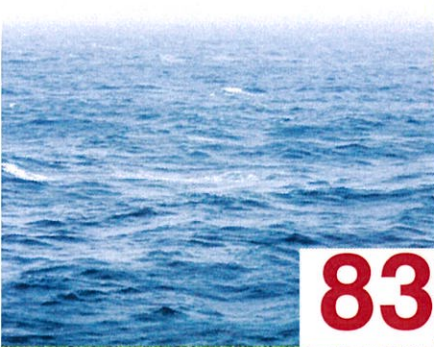

**83**

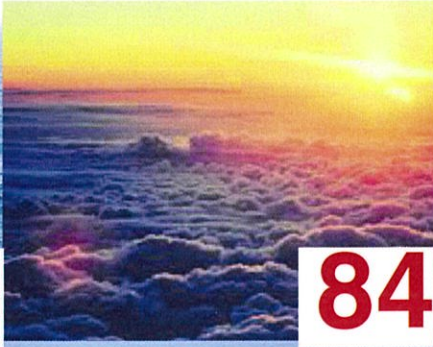

**84**

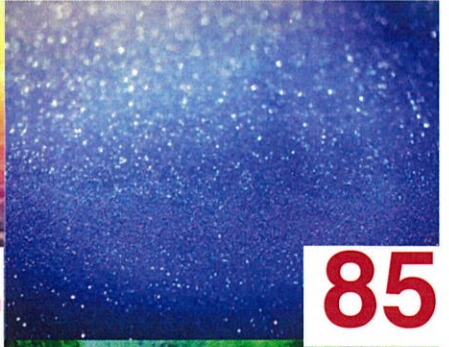

**85**

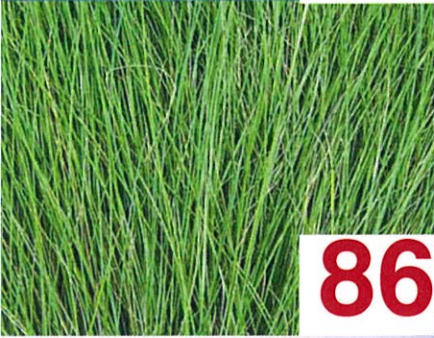

**86**

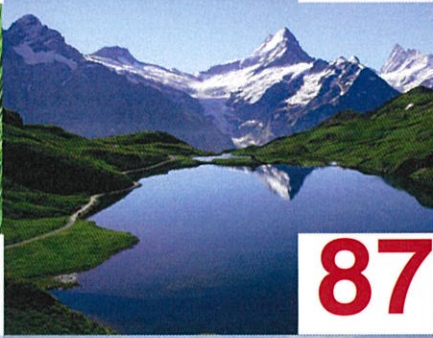

**87**

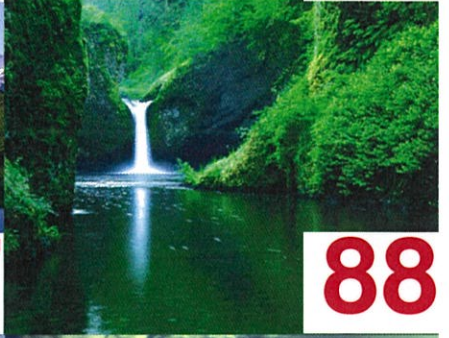

**88**

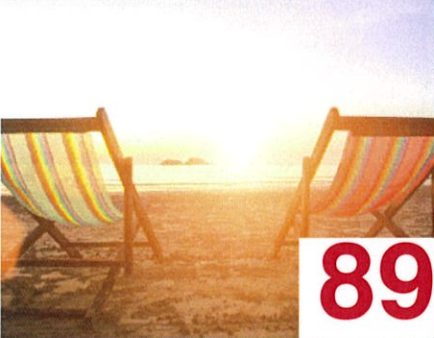

**89**

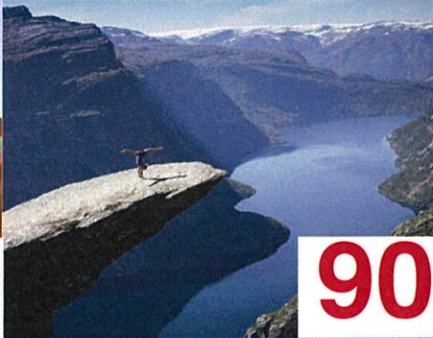

**90**

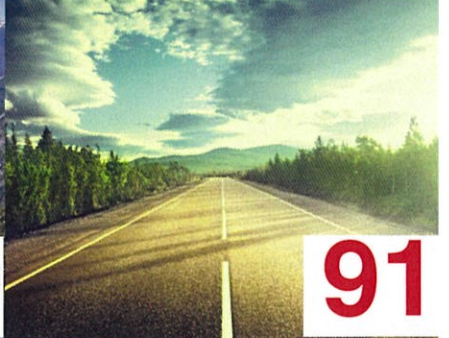

**91**

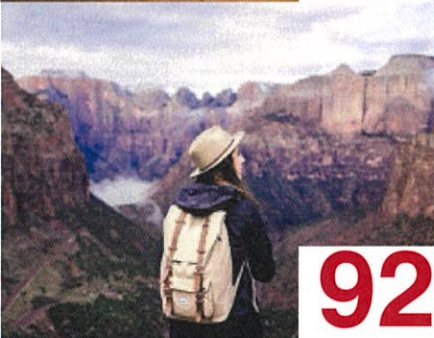

**92**

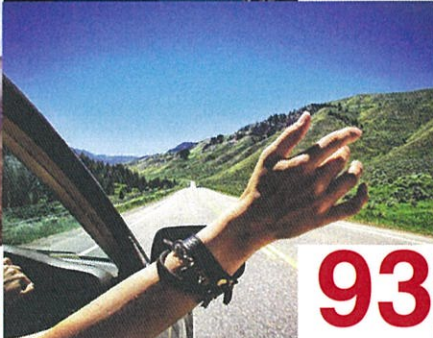

**93**

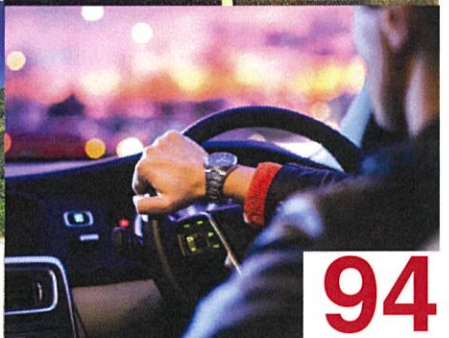

**94**

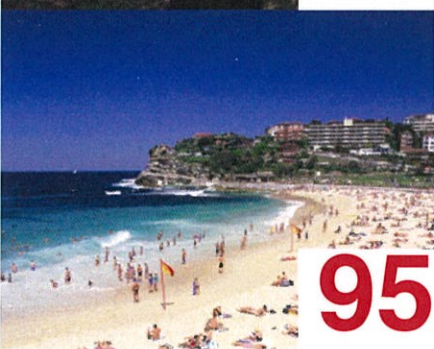

**95**

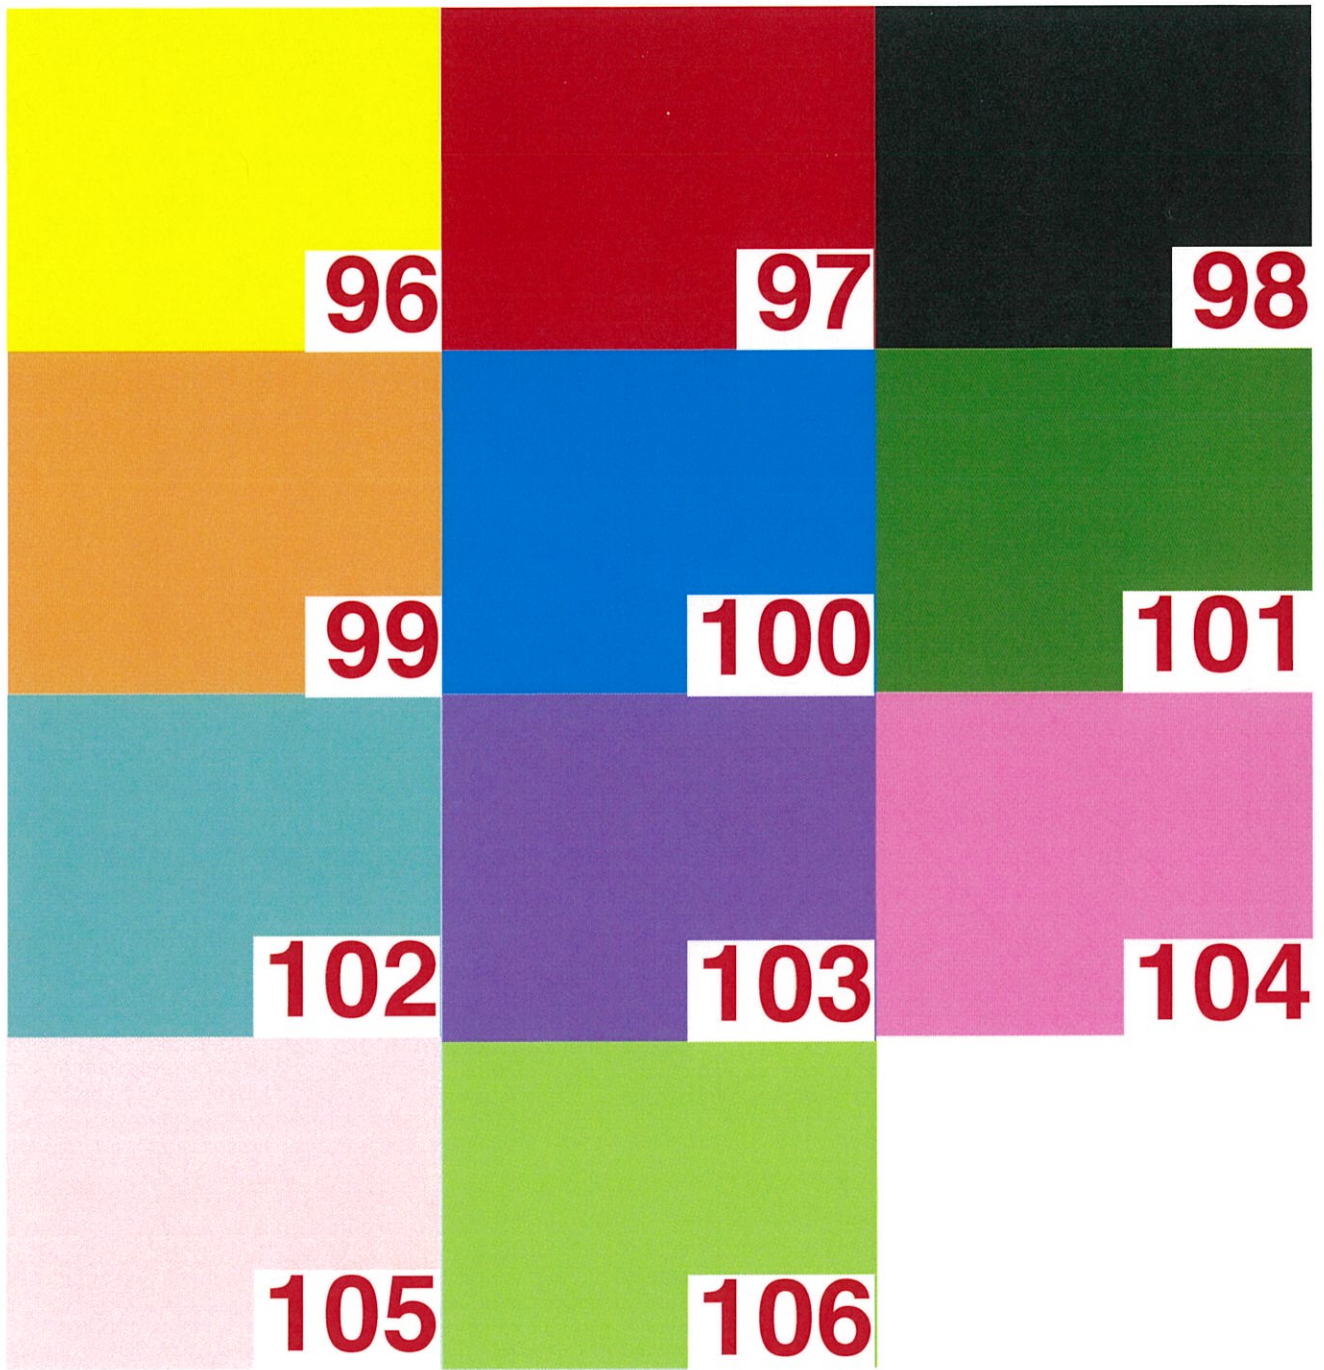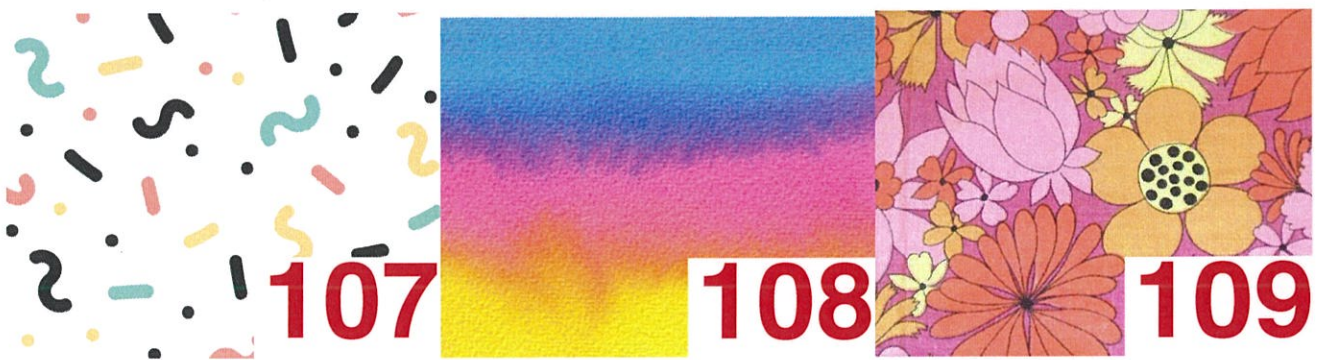

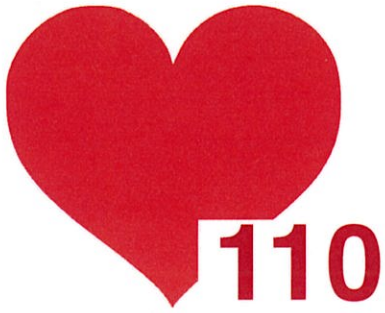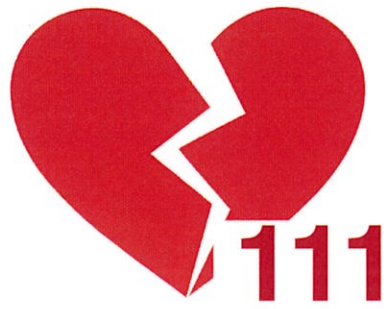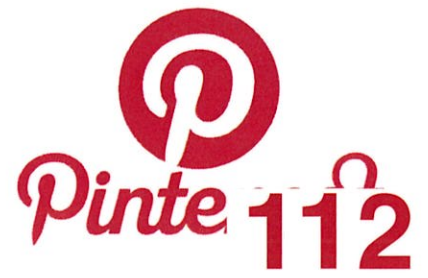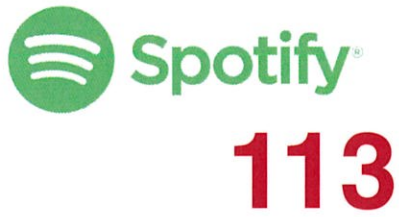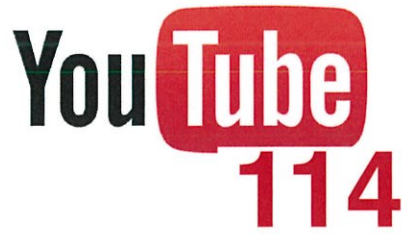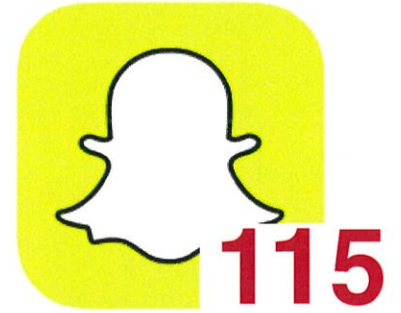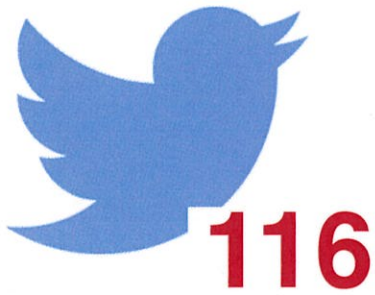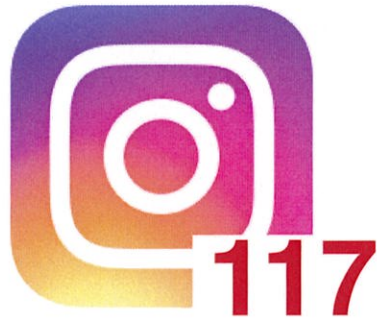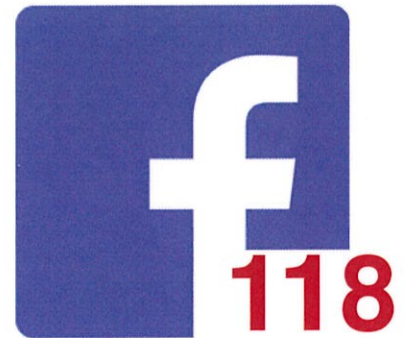



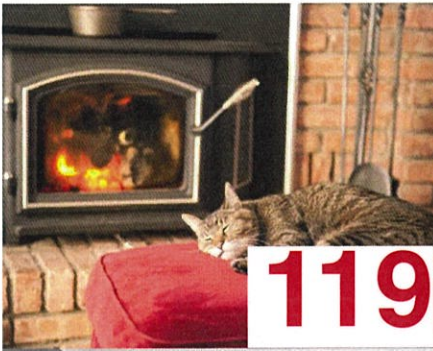

**119**

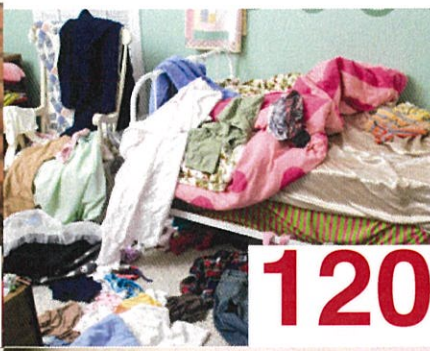

**120**

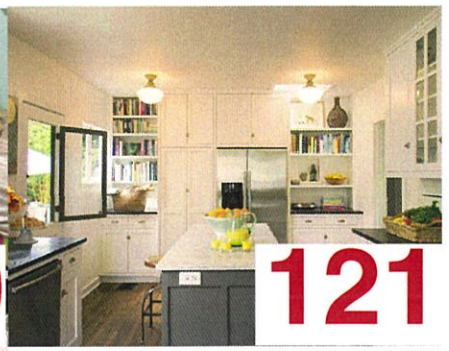

**121**

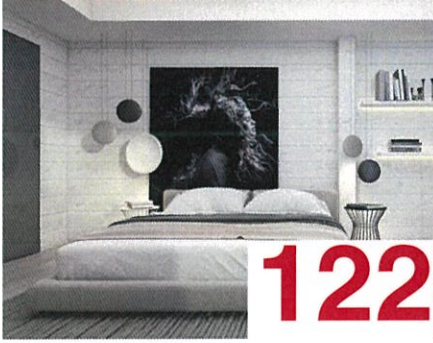

**122**

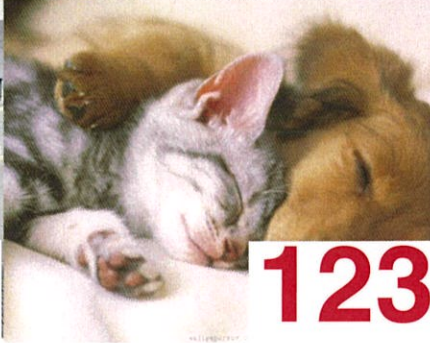

**123**

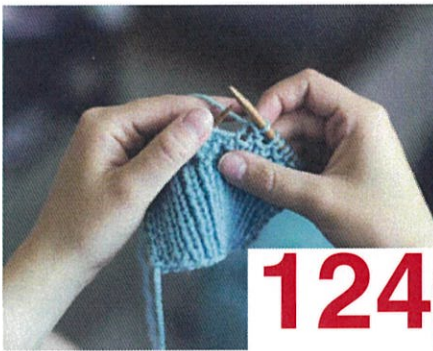

**124**

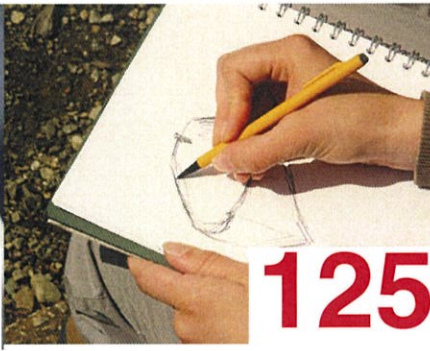

**125**

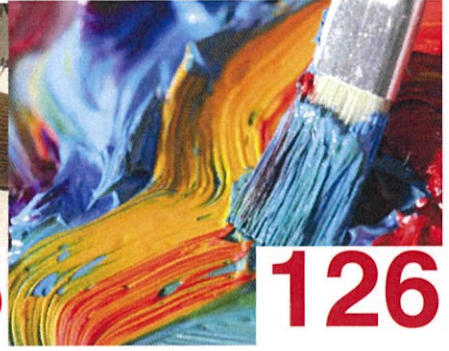

**126**
